# Supplementary material
Source: PubMed Central journal article supplement (PMC3101894)
Supplement: NIHMS291682-supplement-supplement_1.pdf [file NIHMS291682-supplement-supplement_1.pdf]

**Supplement 1: Demographics and socioeconomic status in families who refused or completed the telephone screener**

|                                               | Families who refused screener |                   | Families who completed screener |                   |
|-----------------------------------------------|-------------------------------|-------------------|---------------------------------|-------------------|
|                                               | Number with available data    |                   | Number with available data      |                   |
| Percent of families with Caucasian mother     | 2783 families                 | 96.12%            | 4461 families                   | 97.31%            |
| Percent Male children                         | 15365 children                | 51.12%            | 22575 children                  | 48.62%            |
| Average age of all children                   | 15365 children                | 18.13±5.89 years  | 22575 children                  | 15.94±5.21 years  |
| Average age of study eligible children        | 7189 children                 | 12.83±3.09 years  | 14950 children                  | 13.03±3.13 years  |
| Percent Urban (vs. rural)                     | 2847 families                 | 64.17%            | 4510 families                   | 69.49%            |
| Mean Income <sup>a</sup>                      | 2847 families                 | 44293.62±17493.14 | 4510 families                   | 46755.41±17490.30 |
| % Caucasian <sup>a</sup>                      | 2847 families                 | 90.71%            | 4510 families                   | 91.20%            |
| <i>Average years of education<sup>a</sup></i> |                               |                   |                                 |                   |
| Male                                          | 2847 families                 | 12.97±1.20years   | 4510 families                   | 13.14±1.20 years  |
| Female                                        | 2847 families                 | 12.81±0.92 years  | 4510 families                   | 12.91±0.92 years  |

<sup>a</sup>Within the family's postal code (zip code) area, based on the 2000 U.S. Census

**Supplement 2: Demographic characteristics of subjects aged 7 to 29 years**

| Age group                                                                | N    | Mean Age (SD) | Males (%)    | Females (%)  |
|--------------------------------------------------------------------------|------|---------------|--------------|--------------|
| <b><i>Subjects with complete screener data <sup>a</sup></i></b>          |      |               |              |              |
| Children                                                                 | 6936 | 10.14 (1.82)  | 3572 (51.50) | 3364 (48.50) |
| Adolescents                                                              | 8019 | 15.53 (1.41)  | 4147 (51.71) | 3872 (48.29) |
| Adults                                                                   | 7401 | 21.57 (2.70)  | 3801 (51.36) | 3600 (48.64) |
| <b><i>Subjects with complete SWAN and screener data <sup>b</sup></i></b> |      |               |              |              |
| Children                                                                 | 2704 | 10.20 (1.78)  | 1383 (51.15) | 1321 (48.85) |
| Adolescents                                                              | 3483 | 15.52 (1.40)  | 1811 (52.00) | 1672 (48.00) |
| Adults                                                                   | 3193 | 21.47 (2.64)  | 1622 (50.80) | 1571 (49.20) |

<sup>a</sup> Age at the time of screener used.

<sup>b</sup> Age at the time of SWAN used.

SWAN = Strengths and Weaknesses of ADHD-Symptoms and Normal-behavior

**Supplement 3: Prevalence of lifetime and current DSM-IV-like ADHD subtypes**

| Age groups                                                                | Inattentive |      | Hyperactive-Impulsive |      | Combined |      |
|---------------------------------------------------------------------------|-------------|------|-----------------------|------|----------|------|
|                                                                           | N           | %    | N                     | %    | N        | %    |
| <b><i>Lifetime prevalence (Screener sample)<sup>a</sup></i></b>           |             |      |                       |      |          |      |
| Children (n=6936)                                                         | 536         | 7.73 | 122                   | 1.76 | 240      | 3.46 |
| Adolescents (n=8019)                                                      | 765         | 9.54 | 58                    | 0.72 | 237      | 2.96 |
| Adults (n=7401)                                                           | 497         | 6.72 | 46                    | 0.62 | 174      | 2.35 |
| <b><i>Lifetime prevalence (SWAN plus Screener sample)<sup>b</sup></i></b> |             |      |                       |      |          |      |
| Children (n=2704)                                                         | 225         | 8.32 | 48                    | 1.78 | 86       | 3.18 |
| Adolescents (n=3483)                                                      | 327         | 9.39 | 29                    | 0.83 | 92       | 2.64 |
| Adults (n=3193)                                                           | 227         | 7.11 | 14                    | 0.44 | 72       | 2.25 |
| <b><i>Current prevalence (SWAN plus Screener sample)<sup>c</sup></i></b>  |             |      |                       |      |          |      |
| Children (n=2704)                                                         | 197         | 7.29 | 51                    | 1.89 | 68       | 2.51 |
| Adolescents (n=3483)                                                      | 243         | 6.98 | 32                    | 0.92 | 64       | 1.84 |
| Adults (n=3193)                                                           | 139         | 4.35 | 22                    | 0.69 | 42       | 1.32 |

<sup>a</sup> -Lifetime DSM-IV-like ADHD diagnoses based on screener items for the individuals in the age range of 7-29.99 with complete Screener data.

<sup>b</sup> -Lifetime DSM-IV-like ADHD diagnoses based on screener items for the individuals in the age range of 7-29.99 with complete SWAN and Screener data.

<sup>c</sup> -Current DSM-IV-like ADHD diagnoses based on SWAN items for the individuals in age range of 7-29.99 with complete SWAN and Screener data

SWAN = Strengths and Weaknesses of ADHD-Symptoms and Normal-behavior

**Supplement 4: Analysis of Variance of Strengths and Weaknesses of ADHD-Symptoms and Normal-behavior (SWAN) quantitative subscale scores**

| Variable                          | Mean  | (SD)   | F      | p       |
|-----------------------------------|-------|--------|--------|---------|
| <b>Inattention</b>                |       |        |        |         |
| <i>Gender</i>                     |       |        | 328.96 | <0.0001 |
| Males                             | -0.66 | (1.22) |        |         |
| Females                           | -1.12 | (1.18) |        |         |
| <i>Age group</i>                  |       |        | 132.22 | <0.0001 |
| Children                          | -0.64 | (1.15) |        |         |
| Adolescents                       | -0.82 | (1.24) |        |         |
| Adults                            | -1.14 | (1.22) |        |         |
| <b>Hyperactivity- Impulsivity</b> |       |        |        |         |
| <i>Gender</i>                     |       |        | 183.58 | <0.0001 |
| Males                             | -0.85 | (1.61) |        |         |
| Females                           | -1.18 | (1.15) |        |         |
| <i>Age group</i>                  |       |        | 85.83  | <0.0001 |
| Children                          | -0.78 | (1.12) |        |         |
| Adolescents                       | -1.02 | (1.17) |        |         |
| Adults                            | -1.18 | (1.17) |        |         |
| <b>Total Score</b>                |       |        |        |         |
| <i>Gender</i>                     |       |        | 285.24 | <0.0001 |
| Males                             | -0.76 | (1.12) |        |         |
| Females                           | -1.15 | (1.10) |        |         |
| <i>Age group</i>                  |       |        | 119.9  | <0.0001 |
| Children                          | -0.71 | (1.07) |        |         |
| Adolescents                       | -0.92 | (1.12) |        |         |
| Adults                            | -1.16 | (1.13) |        |         |

**Supplement 5: Regression analysis for continuous and categorical variables in child, adolescent and adult age groups**

| Variable                           |                           | Children            |                    |                  | Adolescents |                    |                  | Adults  |                    |                  |
|------------------------------------|---------------------------|---------------------|--------------------|------------------|-------------|--------------------|------------------|---------|--------------------|------------------|
| Dependent                          | Independent               | Linear regression   |                    |                  |             |                    |                  |         |                    |                  |
|                                    |                           | $\beta$             | SE <sup>a</sup>    | <i>p</i>         | $\beta$     | SE <sup>a</sup>    | <i>p</i>         | $\beta$ | SE <sup>a</sup>    | <i>p</i>         |
| Total quantitative score           | Male sex                  | 0.36                | 0.04               | <b>&lt;0.001</b> | 0.44        | 0.03               | <b>&lt;0.001</b> | 0.27    | 0.04               | <b>&lt;0.001</b> |
|                                    | Age                       | -0.03               | 0.01               | <b>0.003</b>     | -0.02       | 0.01               | <b>0.015</b>     | -0.01   | 0.00               | 0.123            |
| Hyp/Imp Quantitative score         | Male sex                  | 0.34                | 0.04               | <b>&lt;0.001</b> | 0.35        | 0.03               | <b>&lt;0.001</b> | 0.28    | 0.04               | <b>&lt;0.001</b> |
|                                    | Age                       | -0.04               | 0.01               | <b>&lt;0.001</b> | -0.03       | 0.01               | <b>0.003</b>     | -0.01   | 0.008              | 0.123            |
| Inattention Quantitative score     | Male sex                  | 0.37                | 0.04               | <b>&lt;0.001</b> | 0.53        | 0.04               | <b>&lt;0.001</b> | 0.42    | 0.04               | <b>&lt;0.001</b> |
|                                    | Age                       | -0.01               | 0.01               | 0.148            | -0.02       | 0.012              | 0.105            | -0.04   | 0.008              | <b>&lt;0.001</b> |
| Dependent                          | Independent               | Logistic regression |                    |                  |             |                    |                  |         |                    |                  |
|                                    |                           | OR                  | 95%CI <sup>a</sup> | <i>P</i>         | OR          | 95%CI <sup>a</sup> | <i>P</i>         | OR      | 95%CI <sup>a</sup> | <i>P</i>         |
| ADHD Diagnosis Current (SWAN)      | Male sex                  | 2.29                | 1.78-2.95          | <b>&lt;0.001</b> | 2.80        | 2.18-3.60          | <b>&lt;0.001</b> | 2.26    | 1.66-3.08          | <b>&lt;0.001</b> |
|                                    | Age                       | 1.02                | 0.96-1.09          | 0.398            | 0.96        | 0.89-1.04          | 0.359            | 0.90    | 0.84-0.96          | <b>0.001</b>     |
| Inattentive ADHD subtype (SWAN)    | Male sex                  | 2.09                | 1.54-2.85          | <b>&lt;0.001</b> | 2.63        | 1.96-3.53          | <b>&lt;0.001</b> | 2.16    | 1.50-3.12          | <b>&lt;0.001</b> |
|                                    | Age                       | 1.12                | 1.03-1.22          | <b>0.006</b>     | 1.00        | 0.91-1.10          | 0.856            | 0.86    | 0.80-0.93          | <b>&lt;0.001</b> |
| Hyp/Imp ADHD subtype (SWAN)        | Male sex                  | 2.11                | 1.10-4.04          | <b>0.023</b>     | 1.77        | 0.85-3.70          | 0.126            | 1.70    | 0.71-4.07          | 0.233            |
|                                    | Age                       | 0.88                | 0.76-1.02          | 0.095            | 0.95        | 0.76-1.20          | 0.725            | 0.92    | 0.78-1.08          | 0.321            |
| Combined ADHD subtype (SWAN)       | Male sex                  | 2.51                | 1.48-4.27          | <b>0.001</b>     | 3.74        | 2.02-6.92          | <b>&lt;0.001</b> | 2.76    | 1.37-5.55          | <b>0.004</b>     |
|                                    | Age                       | 0.94                | 0.78-1.03          | 0.156            | 0.82        | 0.68-0.99          | <b>0.047</b>     | 1.004   | 0.90-1.1           | 0.928            |
| ADHD Diagnosis Lifetime (Screener) | Male sex                  | 2.26                | 1.79-2.85          | <b>&lt;0.001</b> | 3.13        | 2.51-3.91          | <b>&lt;0.001</b> | 2.13    | 1.65-2.74          | <b>&lt;0.001</b> |
|                                    | Age (screen) <sup>b</sup> | 1.09                | 1.03-1.16          | <b>0.003</b>     | 0.93        | 0.87-1.00          | 0.065            | 0.93    | 0.89-0.98          | <b>0.005</b>     |

Note: Statistically significant *p*-values are shown in bold.

<sup>a</sup> Standard Error (SE) and 95% Confidence Interval (CI) adjusted for family clustering of data using “cluster” option in STATA 9.2

<sup>b</sup> When dependent variable is based on screener, age at time of screener is used. Otherwise, age at SWAN is used.

SWAN = Strengths and Weaknesses of ADHD-Symptoms and Normal-behavior
